# Supplementary material
Source: publisher figshare collection journal article supplement (https://acs.figshare.com/ndownloader/files/4081387)
Supplement: Supplementary file 1 [file 4081387]

# Supporting Information

## Study of a Two-stage Photobase Generator (PBG) for Photolithography in Microelectronics.

Nicholas J. Turro,<sup>\*,#</sup> Yongjun Li,<sup>#</sup> Steffen Jockusch,<sup>#</sup> Yuji Hagiwara,<sup>†</sup> Masahiro  
Okazaki,<sup>†</sup> Ryan A. Mesch,<sup>†</sup> David I. Schuster,<sup>‡</sup> C. Grant Willson,<sup>\*,†</sup>

<sup>#</sup>Department of Chemistry, Columbia University, New York, New York 10027, United States

<sup>†</sup>Chemistry Department, University of Texas, Austin, Texas 78741, United States

<sup>‡</sup> Department of Chemistry, New York University, New York, New York 10003, United States

### Table of content:

|                                                                                                                          | Page |
|--------------------------------------------------------------------------------------------------------------------------|------|
| Figure S1: Laser flash photolysis of <b>1M</b> and <b>3</b> .                                                            | S2   |
| Figure S2: Low-temperature phosphorescence of <b>1M</b> and <b>3</b> .                                                   | S2   |
| Figure S3: Identification of photoproducts of <b>1M</b> by HPLC.                                                         | S3   |
| Figure S4: <sup>1</sup> H NMR spectra of <b>1M</b> before and after photolysis.                                          | S4   |
| Figure S5: HPLC analysis of photolysis of <b>1M</b> at 254 nm.                                                           | S5   |
| Figure S6: Laser flash photolysis of <i>p</i> -OCH <sub>3</sub> - <b>1M</b> and <i>p</i> -OCH <sub>3</sub> -AP.          | S5   |
| Figure S7: Low-temperature phosphorescence of <i>p</i> -OCH <sub>3</sub> - <b>1M</b> and <i>p</i> -OCH <sub>3</sub> -AP. | S6   |
| Figure S8: HPLC analysis of photolysis of <b>2</b> at 254 nm.                                                            | S6   |
| Figure S9: UV absorption spectra of <b>2</b> and <b>4</b> .                                                              | S7   |
| Figure S10: HPLC-MS identification of photoproduct <b>4</b> .                                                            | S7   |
| Figure S11: HPLC analysis of photolysis <b>1</b> .                                                                       | S8   |

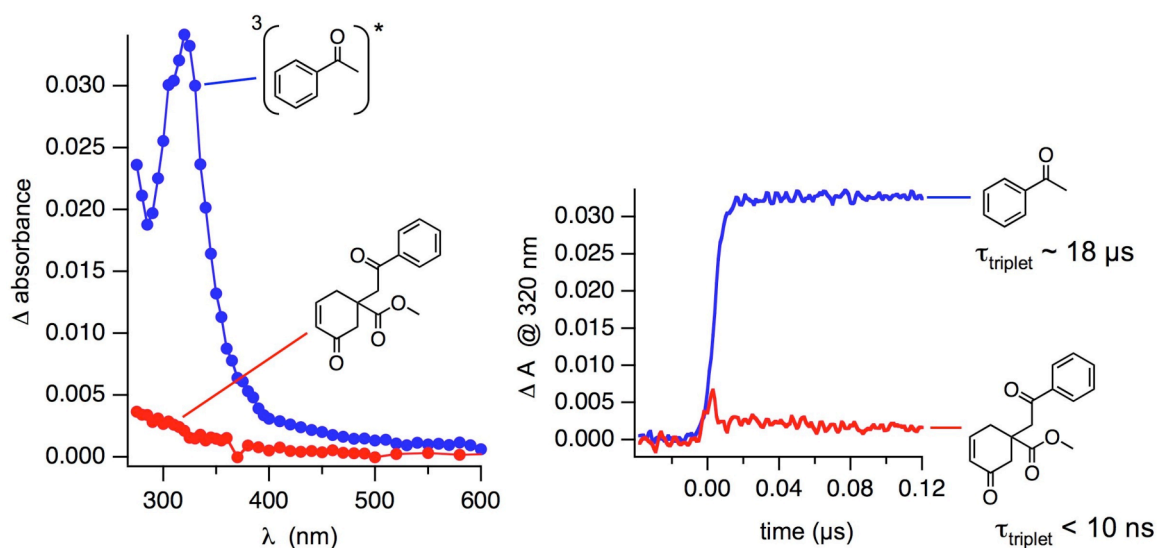

**Figure S1.** Laser flash photolysis of **1M** (red) and **3** (blue) in deoxygenated acetonitrile solutions using a pulsed laser ( $\lambda_{\text{ex}} = 266$  nm, 5 ns pulse length). Left: transient absorption spectra at the end of the laser pulse. Right: kinetic traces monitored at 320 nm.

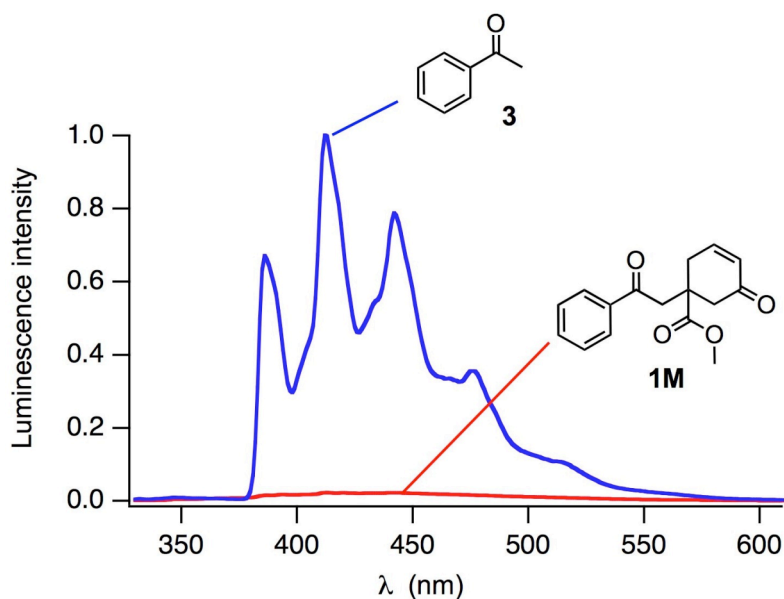

**Figure S2.** Low-temperature luminescence spectra of **1M** (red) and **3** (blue) in ethanol matrix at 77 K (quartz liquid nitrogen dewar) with matching absorbances at the excitation wavelength of  $\lambda_{\text{ex}} = 315$  nm. Suprasil quartz tubes (3 mm inner diameter) as sample containers.

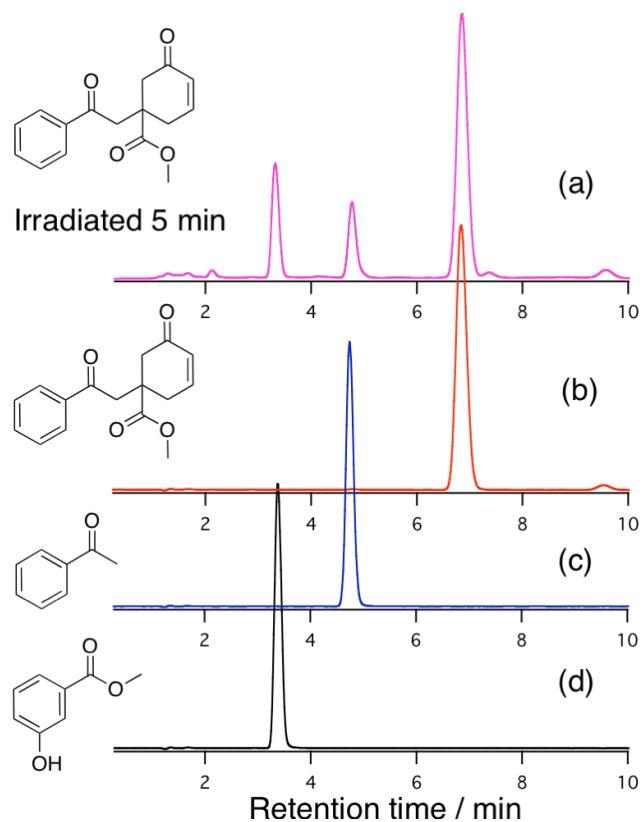

**Figure S3.** Identification of photoproducts of **1M** by HPLC. (a) **1M** (5mM) after irradiation in  $\text{CH}_3\text{CN}$  for 5 min at 300 nm; (b) **1M**; (c) acetophenone; (d) methyl-3-hydroxylbenzoate. HPLC conditions: isocratic, water:  $\text{CH}_3\text{CN}$  = 70:30, PDA detector @ 288 nm.

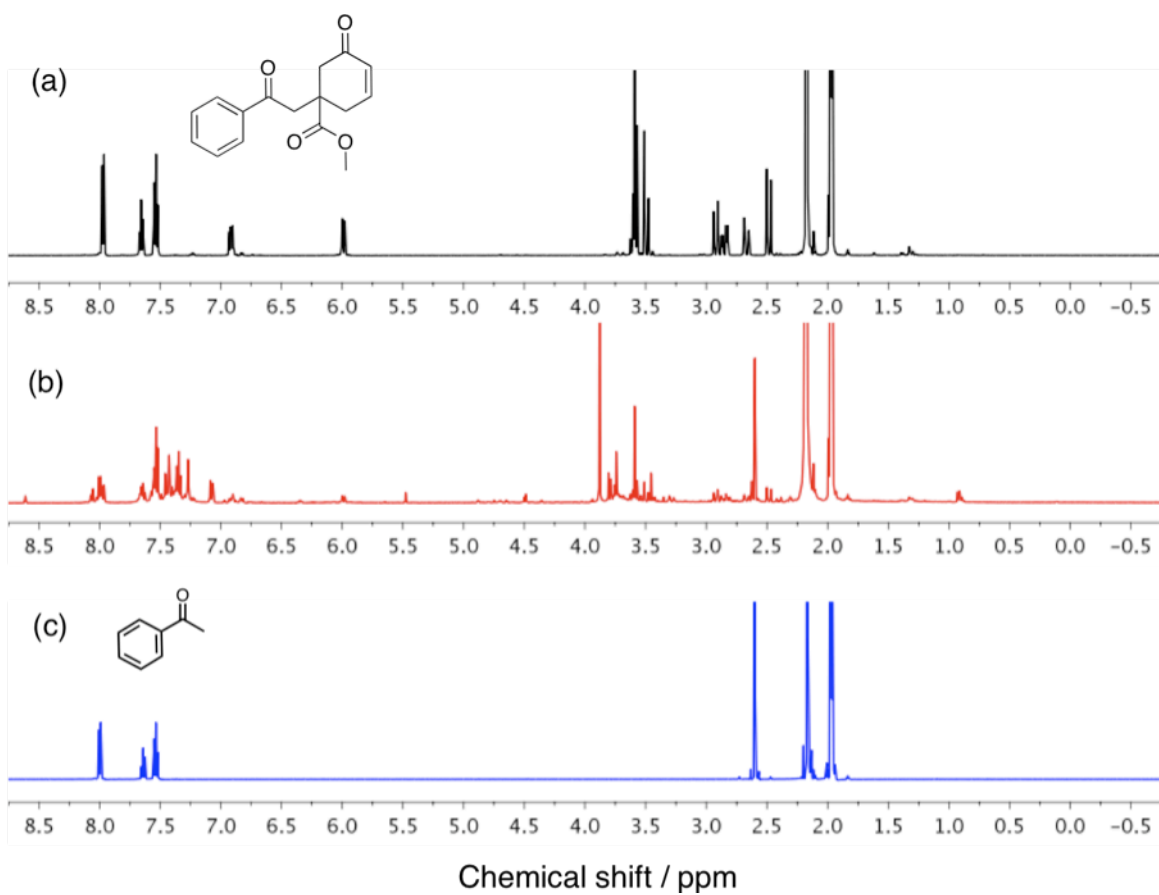

**Figure S4.**  $^1\text{H}$  NMR spectra of **1M** (5 mM) (a), **1M** after irradiated for 20 min (b) and acetophenone (c). All spectra were taken in  $\text{CD}_3\text{CN}$ .

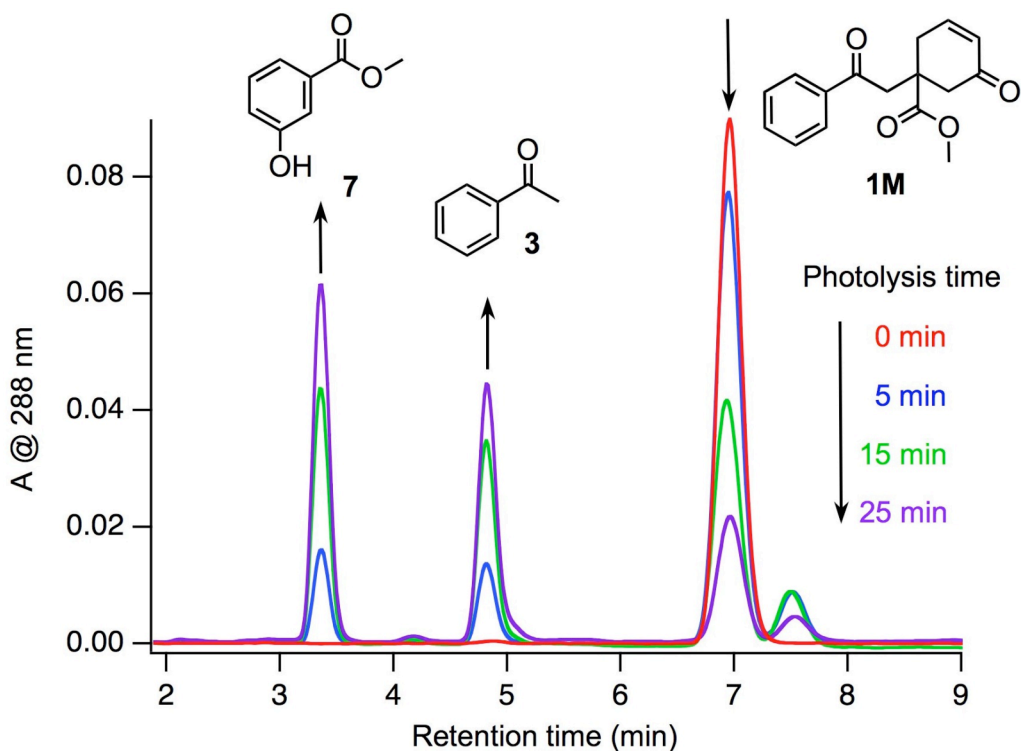

**Figure S5.** HPLC analysis of photolysis at 254 nm of **1M** (5 mM) in deoxygenated acetonitrile solutions. HPLC conditions: isocratic, water: CH<sub>3</sub>CN= 70:30, PDA detector @ 288 nm.

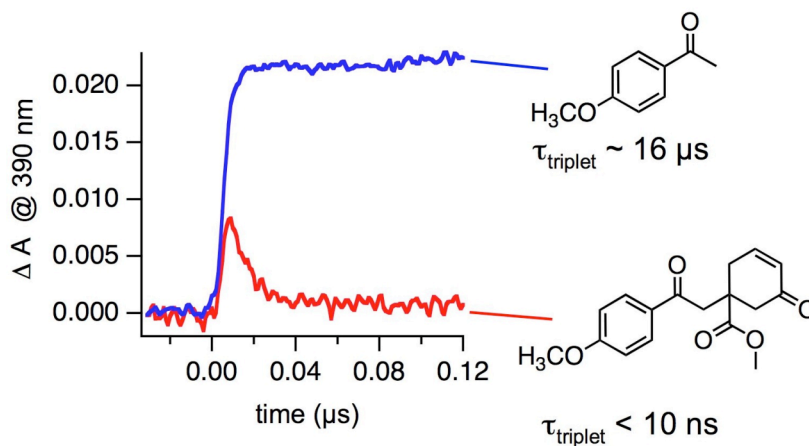

**Figure S6.** Laser flash photolysis of *p*-OCH<sub>3</sub>-**1M** (red) and *p*-OCH<sub>3</sub>-AP (blue) in deoxygenated acetonitrile solutions using a pulsed laser ( $\lambda_{\text{ex}} = 266$  nm, 5 ns pulse length). Kinetic traces monitored at 390 nm.

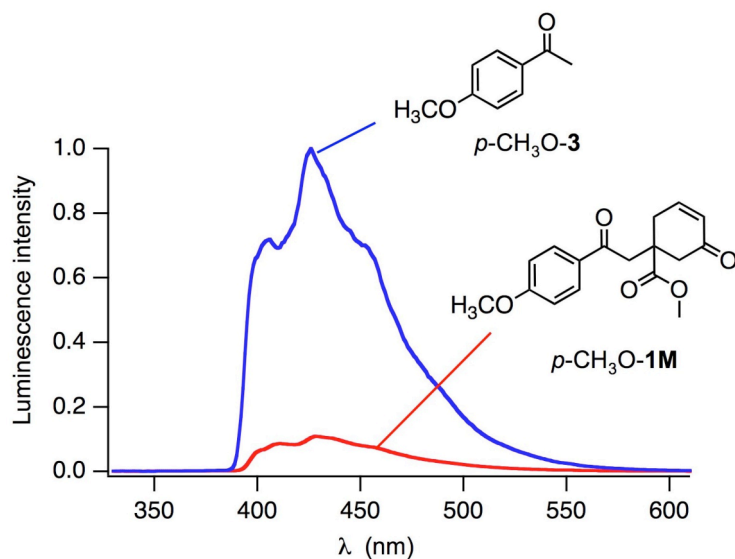

**Figure S7.** Low-temperature luminescence spectra of *p*-OCH<sub>3</sub>-**1M** (red) and *p*-OCH<sub>3</sub>-AP (blue) in ethanol matrix at 77 K (quartz liquid nitrogen dewar) with matching absorbances at the excitation wavelength of  $\lambda_{\text{ex}} = 275$  nm. Suprasil quartz tubes (3 mm inner diameter) as sample containers.

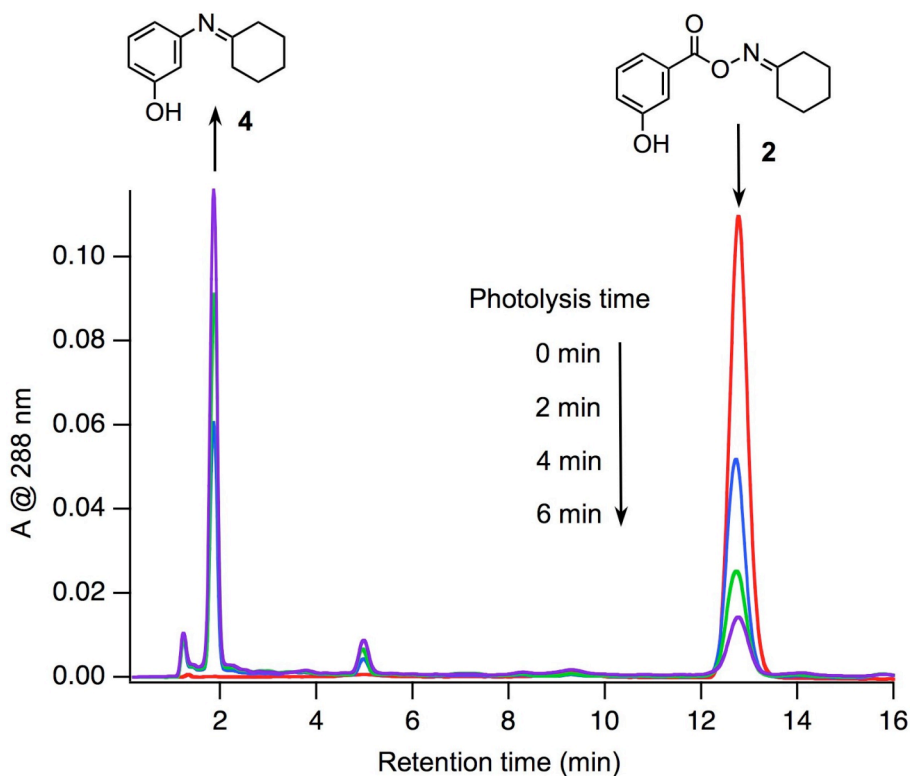

**Figure S8.** HPLC analysis of photolysis at 254 nm of **2** (5 mM) in deoxygenated acetonitrile solutions. HPLC conditions: isocratic, water (0.1% TFA): CH<sub>3</sub>CN= 70:30, PDA detector @ 288 nm.

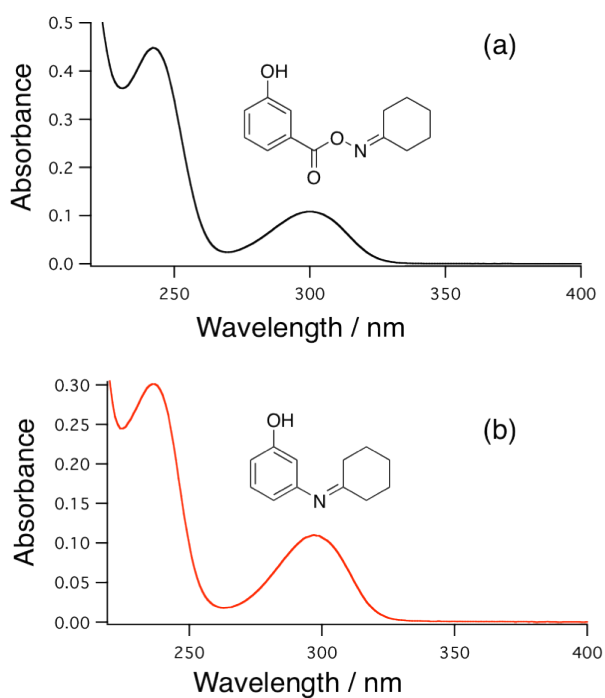

**Figure S9.** UV absorption spectra extracted from HPLC traces (Figure S8) using the PDA detector of photolysis of **2** at 254 nm; (a) **2**, (b) **4**.

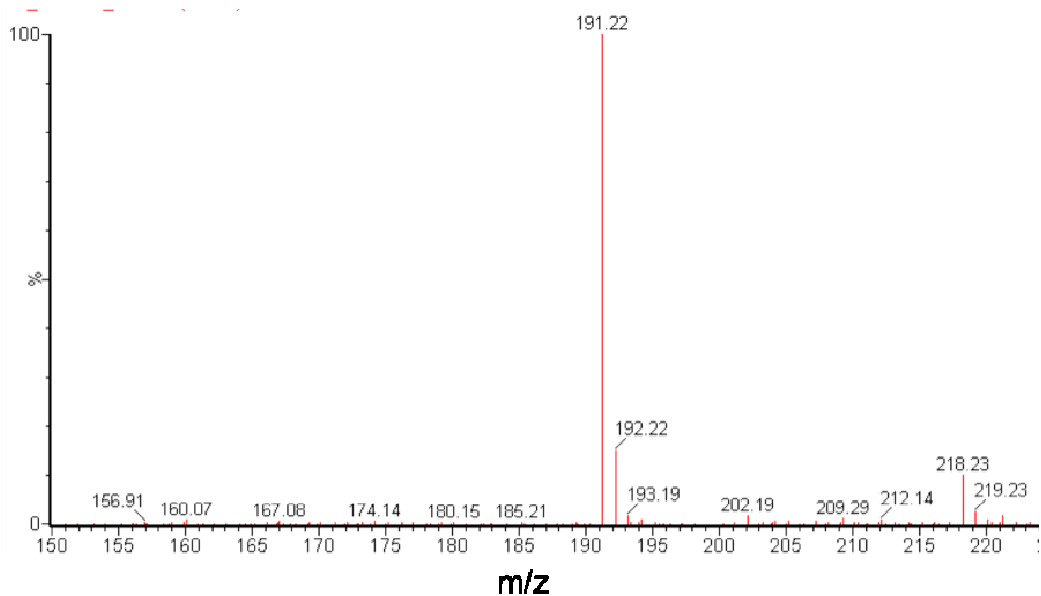

**Figure S10.** HPLC-MS identification of photoproduct **4** after photolysis of **2** at 254 nm for 6 min (see Figure S8).

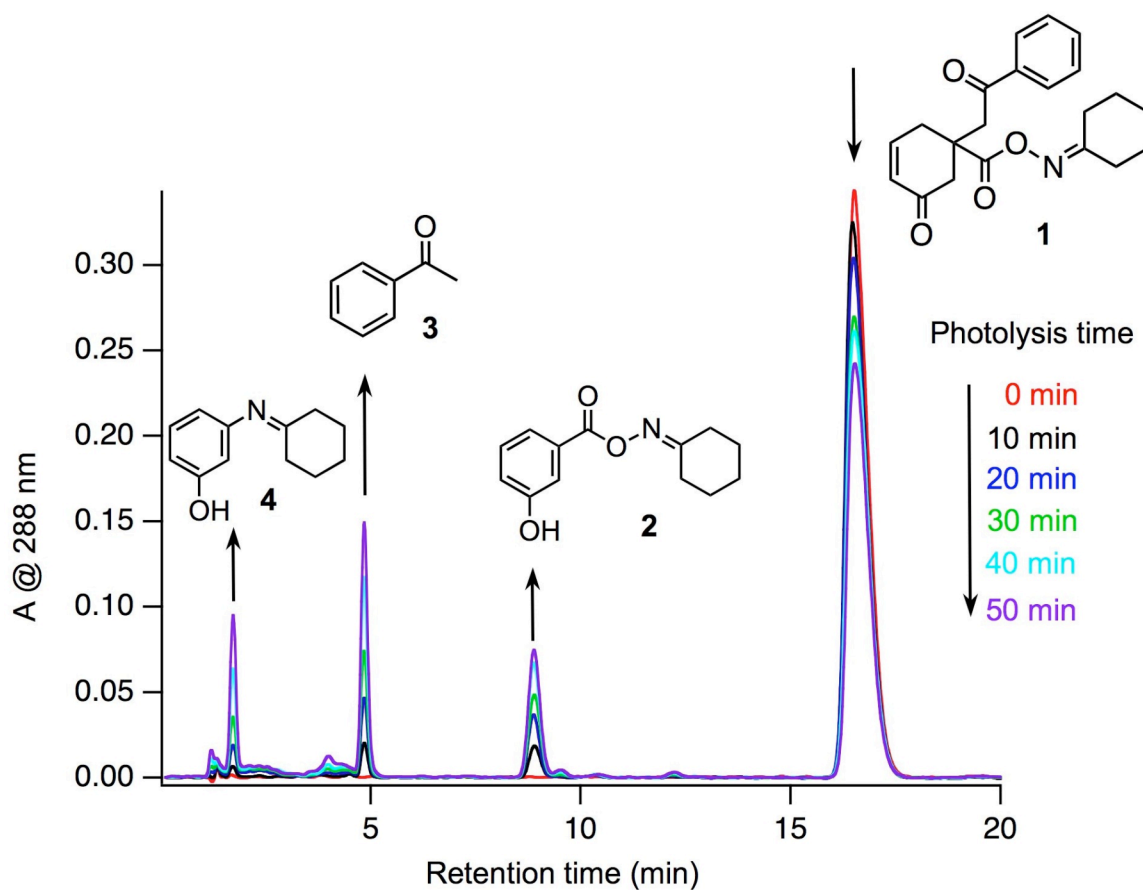

**Figure S11.** HPLC analysis of photolysis **1** (25 mM) at 254 nm of in deoxygenated acetonitrile solutions. HPLC conditions: isocratic, water (0.1% TFA): CH<sub>3</sub>CN= 70:30, PDA detector @ 288 nm.
